# Association of Prothrombotic Status With Markers of Cerebral Small Vessel Disease in Elderly Hypertensive Patients

Michiaki Nagai<sup>1,2</sup>, Satoshi Hoshide<sup>1</sup> and Kazuomi Kario<sup>1</sup>

## BACKGROUND

Aging and hypertension are well-known risk factors for cerebral white matter lesions. Prothrombotic status has been shown to be a risk factor for cardiovascular disease. In this study, we investigated the relationships among prothrombotic status, ambulatory blood pressure (ABP), and white matter hyperintensity (WMH) in elderly hypertensives.

## METHODS

Measurement of prothrombin fragments 1+2 (F1+2), von Willebrand Factor (vWF) and plasminogen activator inhibitor-1 (PAI-1), ABP monitoring (ABPM), and brain magnetic resonance imaging (MRI) were performed in 514 Japanese elderly hypertensives (72.3 years old, male 37%). WMH cases were further divided into deep subcortical white matter lesion (DWML) or periventricular hyperintensity (PVH).

## RESULTS

Deep WMH (DWMH) had significant positive correlations with age, use of antiplatelet agents, log F1+2, log vWF, log PAI-1, and

24-h systolic BP (SBP). PVH had significant positive correlations with age, male gender, smoking, use of antiplatelet agents, white coat hypertension (WCH), log vWF, and 24-h SBP. Severe PVH had significant positive correlations with age, use of antiplatelet agents, WCH, and 24-h SBP, and that was marginally correlated with log F1+2. In the logistic linear regression analysis, log F1+2 was significantly associated with DWMH ( $P < 0.01$ ) and severe PVH ( $P < 0.05$ ) adjusted for age and 24-h SBP. Log PAI-1 was significantly associated with DWMH ( $P < 0.05$ ) adjusted for age and 24-h SBP.

## CONCLUSIONS

In the present study, F1+2 and PAI-1 were positively associated with WMH after adjustment for 24-h SBP in elderly hypertensives. In addition to the conventional risk factors, prothrombotic status might serve as a significant determinant for WMH.

**Keywords:** blood pressure; cerebral small vessel disease; hypertension; prothrombotic status; white matter hyperintensity

*American Journal of Hypertension*, advance online publication 28 June 2012; doi:10.1038/ajh.2012.85

Vascular disease of the brain is a major cause of death and disability.<sup>1</sup> Magnetic resonance imaging (MRI) has revealed that white matter lesions (WMLs) are common in the elderly.<sup>2</sup> And white matter hyperintensity (WMH) has been shown to be associated with stroke.<sup>3</sup> WMH cases were divided into deep WMLs (DWMLs) and periventricular hyperintensity (PVH).

Hypertension is a well-known risk for WMH.<sup>4,5</sup> In addition, ambulatory blood pressure (ABP) has been shown to have a closer correlation with target organ damage including WMH than clinic BP.<sup>6</sup>

Prothrombotic state has been shown to be a risk for cardiovascular disease.<sup>7</sup> Prothrombin factor 1+2 (F1+2) is a peptide released during the conversion of prothrombin into thrombin.<sup>8</sup> The von Willebrand Factor (vWF) is expressed by endothelial cells after tissue damage, and it triggers aggregation of platelets.<sup>7</sup> Plasminogen activator inhibitor-1 (PAI-1) is

an important inhibitor of fibrinolysis.<sup>9</sup> In the earlier literature, several studies reported that coagulation or prothrombotic markers were associated with carotid artery atherosclerosis,<sup>10</sup> atherothrombotic infarction,<sup>11</sup> or WMH.<sup>12,13</sup> Specifically, in multivariate analyses, F1+2, vWF, and PAI-1 had significant correlations with silent cerebral ischemia, whereas the other markers did not.<sup>12,14–16</sup>

However, there have been few studies to investigate the relationship between these markers and WMH in a larger population. The aim of this study was to investigate the relative contribution of prothrombotic status to WMH in a selected population at high risk of cerebral small vessel disease, i.e., elderly hypertensive patients. In this study, we investigated the associations of F1+2, vWF, and PAI-1 with WMH in elderly hypertensives.

## METHODS

**Patients.** We initially enrolled 821 older hypertensive outpatients (clinic BP >140/90 mm Hg and age >50 years) in the Jichi Medical School Ambulatory Blood Pressure Monitoring (JMS-ABPM) study, wave one from six participating institutions (three

<sup>1</sup>Division of Cardiovascular Medicine, Department of Medicine, Jichi Medical University School of Medicine, Tochigi, Japan; <sup>2</sup>Shobara City Soryo Clinic, Hiroshima, Japan. Correspondence: Kazuomi Kario ([kkario@jichi.ac.jp](mailto:kkario@jichi.ac.jp))

Received 23 December 2011; first decision 26 January 2012; accepted 5 May 2012.

© 2012 American Journal of Hypertension, Ltd.

clinics, two hospitals, and one outpatient clinic of a medical school) between 1 January 1992 and 1 January 1998.<sup>14</sup> Patients who had a history of stroke, ischemic heart disease, chronic heart failure, peripheral vascular disease, renal failure (serum creatinine level >2.0 mg/dl), or any clinically relevant arrhythmia (including atrial fibrillation) at baseline were excluded from this study. Measurement of blood sample at baseline was performed in 811 patients (99% of the patients). Among them, analysis was performed for 514 patients after we excluded the patients who did not agree to undergo brain MRI (296 patients) or had incomplete data (one patient). Clinic BP was measured after resting for at least 5 min in a sitting position. Diabetes mellitus was defined as a fasting glucose level >140 mg/dl, a random non-fasting glucose level >200 mg/dl, hemoglobin A<sub>1c</sub> >6.2%, or the use of an oral hypoglycemic agent or insulin.<sup>17–19</sup> Hyperlipidemia was defined as a total cholesterol level >240 mg/dl or the use of an oral lipid-lowering agent.<sup>20</sup> Current smokers were defined as having smoked daily during the past month regardless of the quantity. Body mass index was calculated as weight (in kilograms)/height<sup>2</sup> (in meters squared). This study was approved by the independent research ethics committee, Jichi Medical University School of Medicine, Japan, in 1998. All participants gave written informed consent. Some of the data from the JMS-ABPM study have been published previously.<sup>21,22</sup> This article is a subanalysis of the study.

**Blood samples.** Blood samples were drawn from the cubital vein in the fasting state within 2 months of the day of ABP monitoring (ABPM). In almost all subjects, blood sampling was performed within 1 month before or after the ABPM was conducted and antihypertensive agents discontinued. F1+2 and vWF were determined by using ELISA kits (Diagnostic Stago, Asnieres, France). Plasma levels of PAI-1 were determined using ELISA kits (TDC-88; Teijin, Tokyo, Japan) and were expressed in nanograms per milliliter. The interassay coefficient of variation was 3.6% for F1+2, 4.2% for vWF, and 5.4% for PAI-1.

**Brain MRI.** Brain MRI was carried out using a superconducting magnet with a main strength of 1.5 T (MRT200FXII; Toshiba, Tokyo, Japan, SIGNA Horizon Ver. 5.8; General Electric, Milwaukee, WI, or Vision; SIEMENS, Erlangen, Germany) within 3 months of the JMS-ABPM. T1- and T2-weighted images were obtained in the transverse plane with 7.8–8.0 mm thick sections. We further defined WMH as occurring in the area under the cortex (DWML) or the area adjacent to the ventricles (PVH) in the MRI images, because earlier studies have shown that the etiology, progression rate, and clinical consequences of these subtypes may differ.<sup>23,24</sup> Hyperintense punctate lesions on T2-weighted images were not counted as lacunae if they were not visible as low-intensity areas on T1-weighted images. Proton density images were evaluated for the extent of patchy or diffuse PVHs. The PVH lesions were classified into four grades as previously described.<sup>25</sup> Grade I was defined as no WMLs except for small triangular foci surrounding the frontal horns; grade II was defined as caps in both anterior and posterior horns of the lateral ventricles or additional discrete patchy subcortical WMLs beside

or above the lateral ventricles. More extensive punctate periventricular WMLs and their early confluent stages were classified as grade III. Marked areas of high signal intensity that reached confluence completely surrounding the lateral ventricles were defined as grade IV. Grades III and IV were defined as severe PVH. Because the histological changes underlying mild PVH are not always caused by ischemia, we additionally focused on the group with severe PVH.<sup>4</sup> The MRI images of the subjects were randomly stored and interpreted by neurologists who were blind to the subjects' names and characteristics.<sup>18</sup> In our laboratory, the inter-reader and intra-reader  $\kappa$ -statistics for the PVH grade were 0.812 and 0.851, respectively. The inter-reader and intra-reader  $\kappa$ -statistics for the DWMH were 0.721 and 0.745, respectively.

**ABPM.** ABPM was measured using a validated machine: ABPM-630 (Nippon Colin, Komaki, Japan),<sup>26</sup> TM-2421, or TM-2425 (A&D, Tokyo, Japan).<sup>27</sup> Patients stopped antihypertensive medication for at least 14 days before the ABPM study, and 56.7% of the patients had a history of antihypertensive medication use. Measurements were performed at 30-min intervals for 24 h on a weekday. Hypertensives whose 24-h systolic BP (SBP)/24-h diastolic BP was <130/80 mm Hg were described as having white coat hypertension (WCH).

**Statistical analysis.** Statistical analyses were conducted for 514 patients. Data are shown as the mean ( $\pm$ s.d.), median, or percentages. One-way analysis of variance was used to determine difference in prothrombotic markers among patients with and without DWMH, PVH, and severe PVH. Correlations between variables were performed using Spearman's correlation. Logistic linear regression analysis was performed with DWML, PVH, or severe PVH as a dependent variable (scored 1 when present, and 0 when absent). This model included factors that had correlations with a *P* value threshold <0.1 for DWML, PVH, or severe PVH as determined by Spearman's correlation test. Differences/associations with a *P* value <0.05 were considered statistically significant. All analyses were performed with SPSS version 11.5J statistical software (SPSS, Chicago, IL).

## RESULTS

We compared the baseline characteristics of the 514 patients with MRI and 297 patients without MRI. In the unpaired *t*-test or  $\chi^2$  test, there were significant differences in the baseline characteristics in body mass index (24.2 vs. 23.5 kg/m<sup>2</sup>, *P* < 0.01), diabetes mellitus (14.4 vs. 8.45%, *P* < 0.05), hyperlipidemia (21.8 vs. 13.2%, *P* < 0.01) and the use of antihypertensive agents (56.7 vs. 45.3%, *P* < 0.01), and antiplatelet agents (27.1 vs. 35.3%, *P* < 0.01). Continuous variables of F1+2, vWF, and PAI-1 were tested to detect substantial deviations from the norm by computing the Kolmogorov-Smirnov test. The assumptions of satisfactory normal distribution were not met for all of the examined continuous variables (*P* < 0.001, *P* < 0.001, and *P* < 0.001, respectively). All of the patients included in this study were free from neurological deficits. The mean age of the patients was 72.3  $\pm$  6.4 years (male 37%). **Table 1** presents the clinical characteristics of the patients, laboratory parameters,

and MRI data for WMH. The prevalence of DWMH, PVH, and severe PVH were 34.4, 74.0, and 16.6%, respectively.

In one-way analysis of variance, patients with DWMH had significantly higher mean values of log F1+2, log vWF, and log PAI-1 than those without DWMH. Patients with PVH had a significantly higher mean value of log vWF than those without PVH, whereas patients with severe PVH had significantly higher mean values of log F1+2 than those without severe PVH (Figure 1a–c).

DWMH was significantly positively correlated with PVH and severe PVH, whereas PVH was significantly positively correlated with severe PVH. DWMH was significantly positively correlated with age, use of antiplatelet agents, log F1+2, log vWF, log PAI-1, and 24-h SBP. PVH was significantly positively

correlated with age, male gender, smoking, use of antiplatelet agents, WCH, log vWF, and 24-h SBP. Severe PVH was significantly positively correlated with age, use of antiplatelet agents, WCH, and 24-h SBP, and marginally positively correlated with log F1+2 (Table 2).

In the logistic linear regression analysis, log F1+2 and log PAI-1 were significantly associated with DWMH including age, diabetes mellitus, smoking, antiplatelet agent use, and WCH in the model. The 24-h SBP was significantly associated with PVH when including age, gender, smoking, antiplatelet agent use, and WCH in the model. Log F1+2 was significantly associated with severe PVH when including age, hyperlipidemia, antiplatelet agent use, and WCH in the model (Table 3). A significant interaction was found between antiplatelet agent use and log F1+2 for the DWMH ( $P < 0.05$ ), while there were no significant interactions in any of the other models.

## DISCUSSION

In the present study, prothrombotic status was a significant indicator for WMH in Japanese elderly hypertensives after adjustment for 24-h SBP. These findings may provide some new insights into the pathophysiology underlying the relationship of prothrombotic status with WMH even in patients with a high risk of cardiovascular disease.

In this study, univariate analysis showed that the F1+2 level was significantly correlated with DWMH, and marginally correlated with severe PVH. The association of F1+2 with DWMH and severe PVH remained significant after adjusting for confounding factors in a multiple linear regression model. In previous literature, F1+2 was significantly associated with carotid intima-media thickness in middle-aged subjects free of clinical overt atherosclerotic disease.<sup>10</sup> In the report by Kario *et al.*, a high level of plasma F1+2 was shown to be a risk factor for stroke in elderly hypertensives.<sup>14</sup> On the other hand, in the Austrian Stroke Prevention Study, F1+2 was not associated with WMH lesion progression.<sup>28</sup> That study mainly focused on normal elderly subjects, whereas our study was focused on high-risk older subjects. Thus, the difference in study population might have affected the results. Plasma F1+2 is a peptide released during the conversion of prothrombin into thrombin, which is the final step of the coagulation cascade. So, it was suggested that a status related with coagulation in the cerebral arteries was also associated with WMH. Recently, an immunohistochemistry study by Simpson *et al.*<sup>29</sup> showed that the lesion types differ in their cellular pathology. Specifically, those authors demonstrated that PVH appears to be primarily associated with cerebrospinal fluid leakage into the white matter and subsequent loss of ependymal lining in the ventricles. In addition, the histological changes underlying mild PVH are not always caused by ischemia.<sup>4</sup> The association of F1+2 with DWMH and severe PVH suggests that high plasma F1+2 was related with cerebral ischemic injury, although that pathophysiology might differ in DWMH and severe PVH.

In our study, vWF activity was significantly correlated with DWMH and PVH in the univariate analysis but was marginally associated with PVH in the multiple regression analysis. The vWF activity has been shown to be elevated in patients

**Table 1 | Baseline characteristics**

| Measures                             | Mean $\pm$ s.d.  |
|--------------------------------------|------------------|
| N                                    | 514              |
| Age (years)                          | 72.3 $\pm$ 8.6   |
| Male (%)                             | 37.1             |
| Body mass index                      | 24.2 $\pm$ 3.6   |
| Diabetes mellitus (%)                | 14.4             |
| Hyperlipidemia (%)                   | 21.7             |
| Smoking (%)                          | 21.7             |
| Antihypertensive agents (%)          | 56.7             |
| Antiplatelet agents (%)              | 35.3             |
| FBG (82–110 mg/dl)                   | 94.9 $\pm$ 25.1  |
| Total cholesterol (130–240 mg/dl)    | 201.6 $\pm$ 33.9 |
| Triglycerides (40–130 mg/dl)         | 144.6 $\pm$ 80.3 |
| HDL cholesterol (40–119 mg/dl)       | 47.0 $\pm$ 12.3  |
| Median F1+2 (0.44–1.1 nmol/l)        | 1.42             |
| Interquartile range of F1+2          | 1.14–1.77        |
| Median vWF (50–150%)                 | 160              |
| Interquartile range of vWF           | 132–198          |
| Median PAI-1 (<50 ng/ml)             | 35.0             |
| Interquartile range of PAI-1         | 24.4–57.5        |
| BP measures                          |                  |
| Clinic SBP (mm Hg)                   | 165 $\pm$ 19     |
| DBP (mm Hg)                          | 91 $\pm$ 14      |
| PR (bpm)                             | 77 $\pm$ 12      |
| 24-h SBP (mm Hg)                     | 138 $\pm$ 17     |
| DBP (mm Hg)                          | 79 $\pm$ 10      |
| PR (bpm)                             | 71 $\pm$ 8       |
| White coat hypertension (%)          | 29.7             |
| Deep white matter hyperintensity (%) | 34.4             |
| PVH (%)                              | 74.0             |
| Severe PVH (III,IV) (%)              | 16.6             |

The numbers in parentheses indicate the normal range. Data presented as mean  $\pm$  s.d. bpm, beats per minute; BP, blood pressure; DBP, diastolic BP; FBG, fasting blood glucose; HDL, high-density lipoprotein; PAI-1, plasminogen activator inhibitor-1; PR, pulse rate; PVH, periventricular hyperintensity; SBP, systolic BP; vWF, von Willebrand Factor.

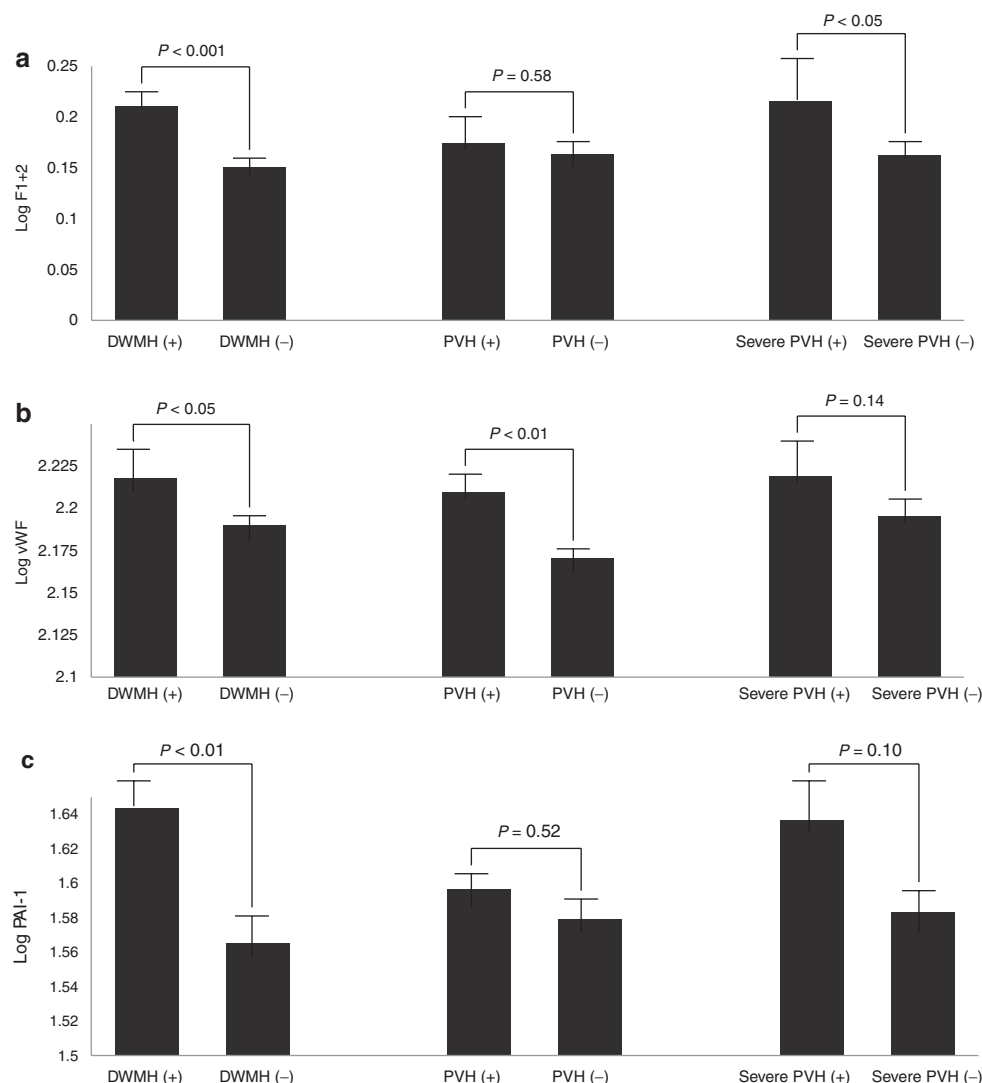

**Figure 1** | Mean values of (a) log F1+2, (b) log vWF, and (c) log PAI-1 are presented in patients with and without deep white matter hyperintensity (DWMH), periventricular hyperintensity (PVH), and severe PVH. One-way analysis of variance was used to determine differences between two groups. F1+2, prothrombin fragments 1+2; PAI-1, plasminogen activator inhibitor-1; vWF, von Willebrand Factor.

with atherothrombotic infarction.<sup>11</sup> A time course study in patients with stroke suggested that vWF represented continuous and chronic endothelial dysfunction in the cerebral arteries.<sup>30</sup> Kohriyama *et al.* reported vWF activity was significantly correlated with PVH grade.<sup>13</sup> And recent studies have reported the positive relationship between vWF concentration and WMH in elderly hypertensives with cognitive impairment.<sup>12</sup> In these points, although vWF was suggested to serve as a potential surrogate marker for endothelial function, vWF might have a weaker association with WMH in elderly hypertensives compared with those with neurological deficits.

PAI-1 is extensively present in small blood vessels in the white matter,<sup>31</sup> and this protein was suggested to be involved in mediating neuronal cell damage.<sup>32</sup> Although exact mechanisms are still unknown, low activity of PAI-1 is associated with brain tissue damage resulting from NMDA (N-methyl-D-aspartate)-induced ischemia after crossing the blood-brain barrier.<sup>33,34</sup> On the other hand, in this study, PAI-1 had signifi-

cant positive correlation with DWMH and PVH, while it was significantly associated only with DWMH in the multivariate analysis. In the report by Kario *et al.*, a high level of plasma F1+2 was shown to be a risk factor of stroke in elderly hypertensives.<sup>14</sup> An increased level of PAI-1 might be associated with stroke via cerebral small artery damage.

Hypertension was previously shown to be associated with a prothrombotic state.<sup>35</sup> In the follow-up study, Lip *et al.*<sup>36</sup> reported that patients with death or adverse cardiovascular events had high plasma vWF level. In the earlier literature, Kario *et al.* reported that the F1+2 level and vWF significantly increased according to the number of silent cerebral infarctions in the elderly at high risk of cardiovascular disease.<sup>15</sup> The results in this study confirmed the previous reports that investigated the relationship between prothrombotic status and silent cerebral injury. Both WMH and silent cerebral infarction are suggested as indicators of microvascular brain injury. However, the pathogenesis of these abnormalities is

**Table 2 | Correlation between prothrombotic markers, BP measures, and white matter lesions**

|                                            |             | DWMH (n = 177) |         | PVH (n = 381) |         | Severe PVH (n = 85) |         |
|--------------------------------------------|-------------|----------------|---------|---------------|---------|---------------------|---------|
|                                            |             | r              | P value | r             | P value | r                   | P value |
| Age (years)                                |             | 0.174          | <0.001  | 0.299         | <0.001  | 0.187               | <0.001  |
| Gender (male = 1, female = 0)              |             | 0.045          | 0.31    | 0.135         | <0.01   | 0.059               | 0.18    |
| Body mass index (kg/m <sup>2</sup> )       |             | −0.057         | 0.20    | −0.035        | 0.43    | 0.007               | 0.87    |
| Diabetes mellitus ((+) = 1, (−) = 0)       |             | 0.077          | 0.08    | 0.054         | 0.22    | 0.027               | 0.55    |
| Hyperlipidemia ((+) = 1, (−) = 0)          |             | 0.025          | 0.57    | 0.012         | 0.78    | 0.083               | 0.06    |
| Smoking ((+) = 1, (−) = 0)                 |             | 0.084          | 0.06    | 0.098         | <0.05   | 0.057               | 0.20    |
| Antihypertensive agents ((+) = 1, (−) = 0) |             | −0.003         | 0.95    | 0.044         | 0.31    | 0.051               | 0.25    |
| Antiplatelet agents ((+) = 1, (−) = 0)     |             | 0.209          | <0.001  | 0.198         | <0.001  | 0.229               | <0.001  |
| FBG (mg/dl)                                |             | 0.004          | 0.92    | 0.001         | 0.51    | −0.028              | 0.53    |
| Total cholesterol (mg/dl)                  |             | −0.004         | 0.92    | 0.008         | 0.86    | 0.022               | 0.62    |
| Triglycerides (mg/dl)                      |             | −0.024         | 0.59    | 0.028         | 0.52    | 0.058               | 0.19    |
| HDL cholesterol (mg/dl)                    |             | −0.062         | 0.16    | −0.073        | 0.10    | −0.057              | 0.20    |
| Log F1+2                                   |             | 0.158          | <0.001  | 0.019         | 0.66    | 0.086               | 0.051   |
| Log vWF                                    |             | 0.106          | <0.05   | 0.136         | <0.01   | 0.070               | 0.11    |
| Log PAI-1                                  |             | 0.139          | <0.01   | 0.021         | 0.64    | 0.077               | 0.08    |
| BP measures                                |             |                |         |               |         |                     |         |
| Clinic                                     | SBP (mm Hg) | 0.111          | <0.05   | 0.157         | <0.001  | 0.105               | <0.05   |
|                                            | DBP (mm Hg) | 0.053          | 0.23    | 0.133         | <0.01   | 0.123               | <0.01   |
|                                            | PR (bpm)    | 0.022          | 0.62    | 0.010         | 0.82    | 0.065               | 0.24    |
| 24-h                                       | SBP (mm Hg) | 0.111          | <0.05   | 0.261         | <0.001  | 0.182               | <0.001  |
|                                            | DBP (mm Hg) | 0.080          | 0.07    | 0.195         | <0.001  | 0.160               | <0.01   |
|                                            | PR (bpm)    | −0.026         | 0.56    | −0.021        | 0.64    | 0.045               | 0.31    |
| White coat hypertension ((+) = 1, (−) = 0) |             | −0.077         | 0.08    | −0.215        | <0.001  | −0.163              | <0.001  |
| DWMH ((+) = 1, (−) = 0)                    |             | —              | —       | 0.308         | <0.001  | 0.394               | <0.001  |
| PVH ((+) = 1, (−) = 0)                     |             | 0.308          | <0.001  | —             | —       | 0.264               | <0.001  |
| Severe PVH ((+) = 1, (−) = 0)              |             | 0.394          | <0.001  | 0.264         | <0.001  | —                   | —       |

Correlation coefficients (r) by Spearman's test are shown.  
bpm, beats per minute; BP, blood pressure; DBP, diastolic BP; DWMH, deep white matter hyperintensity; F1+2, prothrombin fragments 1+2; FBG, fasting blood glucose; HDL, high-density lipoprotein; PAI-1, plasminogen activator inhibitor-1; PR, pulse rate; PVH, periventricular hyperintensity; SBP, systolic BP; vWF, von Willebrand Factor.

**Table 3 | Logistic regression analysis with white matter lesions as dependent factors**

|                         | DWMH                                        | PVH                                         | Severe PVH                                  |
|-------------------------|---------------------------------------------|---------------------------------------------|---------------------------------------------|
|                         | Regression coefficient (95% CI),<br>P value | Regression coefficient (95% CI),<br>P value | Regression coefficient (95% CI),<br>P value |
| Age/year                | 1.09 (1.06–1.12), <0.001                    | 1.09 (1.06–1.12), <0.001                    | 1.06 (1.02–1.09), <0.001                    |
| Gender, male            | —                                           | 1.63 (0.95–2.81), 0.08                      | —                                           |
| Diabetes mellitus       | 1.20 (0.70–2.08), 0.51                      | —                                           | —                                           |
| Hyperlipidemia          | —                                           | —                                           | 1.76 (0.99–3.12), 0.054                     |
| Smoking                 | 1.29 (0.81–2.06), 0.29                      | 1.40 (0.73–2.69), 0.31                      | —                                           |
| Antiplatelet agents use | 2.23 (1.49–3.33), <0.001                    | 2.28 (1.36–3.83), <0.01                     | 3.02 (1.81–5.04), <0.001                    |
| Log F1+2                | 4.30 (1.49–12.4), <0.01                     | 0.890 (0.27–2.97), 0.89                     | 4.38 (1.12–17.1), <0.05                     |
| Log vWF                 | 2.37 (0.53–10.5), 0.26                      | 4.99 (0.99–25.1), 0.051                     | 1.47 (0.20–10.7), 0.70                      |
| Log PAI-1               | 2.26 (1.07–4.74), <0.05                     | 0.695 (0.29–1.66), 0.41                     | 1.46 (0.57–3.72), 0.43                      |
| White coat hypertension | 1.06 (0.57–1.95), 0.86                      | 0.70 (0.35–1.39), 0.31                      | 0.41 (0.17–0.97), <0.05                     |
| 24-h SBP (mm Hg)        | 1.01 (0.995–1.03), 0.16                     | 1.03 (1.01–1.05), <0.05                     | 1.01 (0.99–1.03), 0.24                      |

Parameters were added simultaneously to the regression models.  
CI, confidence interval; DWMH, deep white matter hyperintensity; F1+2, prothrombin fragments 1+2; PAI-1, plasminogen activator inhibitor-1; PVH, periventricular hyperintensity; SBP, systolic blood pressure; vWF, von Willebrand Factor.

not fully understood; a diffuse arteriopathy affecting the deep, small, perforating cerebral vessels has been proposed as the mechanism underlying chronic ischemia, ischemic demyelination, axonal loss, and gliosis.<sup>37,38</sup> Prothrombotic status was suggested as an additional indicator for silent cerebral injury among the elderly at high risk of cardiovascular disease.

### Study limitations

This was a post-hoc analysis of the JMS-ABPM study previously conducted for reasons other than examining the relationship between prothrombotic status and WMH. Subjects with MRIs were at higher risk of cardiovascular disease compared with those without MRIs. This study was based on a cross-sectional design. Thus, it is difficult to conclude exactly which measures are causes of WMH. Further prospective studies are needed to investigate whether the increased levels of prothrombotic markers are risk factors of WMH progression. There is a possibility that prothrombotic status was altered secondarily to the cerebral lesions rather than the other way around. In addition, blood samples were not measured repeatedly; thus, there may have been a lack of reproducibility and an underestimation of the true associations of these markers with WMH. Because blood sampling was conducted on a different day from the ABPM, the associations among the prothrombotic status, 24-h SBP, and WMLs might be underestimated in this study. There would be circadian variations in the measurement of prothrombotic markers; unfortunately, there is a lack of data on circadian variation. Measures of F1+2, vWF, and PAI-1 do not constitute all of the markers of prothrombotic status. However, in the earlier literature, those studies that investigated the relationship of prothrombotic status with target organ damage were based on only one marker.<sup>10,12</sup> Results based on F1+2, vWF, and PAI-1 in this study would thus be more robust regarding the relationship between prothrombotic status and WMH. A significant interaction was found between antiplatelet agent use and log F1+2 for DWMH. Antiplatelet agent use might have affected the relationship between prothrombotic status and WML.

### Perspectives

In the present study, F1+2 and PAI-1 were significantly positively associated with WMH after adjustment for 24-h SBP in elderly hypertensives. In addition to conventional risk factors, prothrombotic status might serve as a significant determinant for WMH. Further studies seem warranted to determine whether elderly hypertensives with increased prothrombotic status have a poorer prognosis.

**Acknowledgments:** This study was supported by a Research Grant for Geriatrics and Gerontology (22-5) from the Ministry of Health, Labor, and Welfare, Japan

**Disclosure:** The authors declared no conflict of interest.

1. AHA. Heart disease and stroke statistics - update. 2005.
2. Liao D, Cooper L, Cai J, Toole J, Bryan N, Burke G, Shahar E, Nieto J, Mosley T, Heiss G. The prevalence and severity of white matter lesions, their relationship with age, ethnicity, gender, and cardiovascular disease risk factors: the ARIC Study. *Neuroepidemiology* 1997; 16:149–162.
3. Vermeer SE, Hollander M, van Dijk EJ, Hofman A, Koudstaal PJ, Breteler MM; Rotterdam Scan Study. Silent brain infarcts and white matter lesions increase

- stroke risk in the general population: the Rotterdam Scan Study. *Stroke* 2003; 34:1126–1129.
4. Chimowitz MI, Estes ML, Furlan AJ, Awad IA. Further observations on the pathology of subcortical lesions identified on magnetic resonance imaging. *Arch Neurol* 1992; 49:747–752.
5. Longstreth WT Jr, Manolio TA, Arnold A, Burke GL, Bryan N, Jungreis CA, Enright PL, O'Leary D, Fried L. Clinical correlates of white matter findings on cranial magnetic resonance imaging of 3301 elderly people. The Cardiovascular Health Study. *Stroke* 1996; 27:1274–1282.
6. Shimada K, Kawamoto A, Matsubayashi K, Ozawa T. Silent cerebrovascular disease in the elderly. Correlation with ambulatory pressure. *Hypertension* 1990; 16:692–699.
7. Vischer UM. von Willebrand factor, endothelial dysfunction, and cardiovascular disease. *J Thromb Haemost* 2006; 4:1186–1193.
8. Bizzarro S, Nicu EA, van der Velden U, Laine ML, Loos BG. Association of serum immunoglobulin G (IgG) levels against two periodontal pathogens and prothrombotic state: a clinical pilot study. *Thromb J* 2010; 8:16.
9. Lijnen HR. Pleiotropic functions of plasminogen activator inhibitor-1. *J Thromb Haemost* 2005; 3:35–45.
10. Páramo JA, Orbe J, Belouqui O, Benito A, Colina I, Martínez-Vila E, Díez J. Prothrombin fragment 1+2 is associated with carotid intima-media thickness in subjects free of clinical cardiovascular disease. *Stroke* 2004; 35:1085–1089.
11. Kozuka K, Kohriyama T, Nomura E, Ikeda J, Kajikawa H, Nakamura S. Endothelial markers and adhesion molecules in acute ischemic stroke—sequential change and differences in stroke subtype. *Atherosclerosis* 2002; 161:161–168.
12. Kearney-Schwartz A, Rossignol P, Bracard S, Felblinger J, Fay R, Boivin JM, Lecomte T, Lacolley P, Benetos A, Zannad F. Vascular structure and function is correlated to cognitive performance and white matter hyperintensities in older hypertensive patients with subjective memory complaints. *Stroke* 2009; 40:1229–1236.
13. Kohriyama T, Yamaguchi S, Tanaka E, Yamamura Y, Nakamura S. [Coagulation and fibrinolytic parameters as predictors for small-vessel disease revealed by magnetic resonance imaging of the brain]. *Rinsho Shinkeigaku* 1996; 36:640–647.
14. Kario K, Yano Y, Matsuo T, Hoshida S, Eguchi K, Shimada K. Additional impact of morning haemostatic risk factors and morning blood pressure surge on stroke risk in older Japanese hypertensive patients. *Eur Heart J* 2011; 32:574–580.
15. Kario K, Matsuo T, Kobayashi H, Asada R, Matsuo M. 'Silent' cerebral infarction is associated with hypercoagulability, endothelial cell damage, and high Lp(a) levels in elderly Japanese. *Arterioscler Thromb Vasc Biol* 1996; 16:734–741.
16. Knottnerus ILH, Govers-Riemsag JWP, Hamulyak K, Rouhl RPW, Staals J, Spronk HHM, van Oerle R, van Raak EPM, Lodder J, ten Cate H, van Oostenbrugge RJ. Endothelial activation in lacunar stroke subtypes. *Stroke* 2010; 41:1617–1622.
17. Folsom AR, Eckfeldt JH, Weitzman S, Ma J, Chambless LE, Barnes RW, Cram KB, Hutchinson RG. Relation of carotid artery wall thickness to diabetes mellitus, fasting glucose and insulin, body size, and physical activity. Atherosclerosis Risk in Communities (ARIC) Study Investigators. *Stroke* 1994; 25:66–73.
18. Fried LP, Kronmal RA, Newman AB, Bild DE, Mittelmark MB, Polak JF, Robbins JA, Gardin JM. Risk factors for 5-year mortality in older adults: the Cardiovascular Health Study. *JAMA* 1998; 279:585–592.
19. Wong TY, Klein R, Sharrett AR, Schmidt MI, Pankow JS, Couper DJ, Klein BE, Hubbard LD, Duncan BB; ARIC Investigators. Retinal arteriolar narrowing and risk of diabetes mellitus in middle-aged persons. *JAMA* 2002; 287:2528–2533.
20. New cholesterol treatment guidelines. *Cholesterol Update* 1987; 1:2.
21. Kario K, Pickering TG, Umeda Y, Hoshida S, Hoshida Y, Morinari M, Murata M, Kuroda T, Schwartz JE, Shimada K. Morning surge in blood pressure as a predictor of silent and clinical cerebrovascular disease in elderly hypertensives: a prospective study. *Circulation* 2003; 107:1401–1406.
22. Kario K, Shimada K, Schwartz JE, Matsuo T, Hoshida S, Pickering TG. Silent and clinically overt stroke in older Japanese subjects with white-coat and sustained hypertension. *J Am Coll Cardiol* 2001; 38:238–245.
23. de Groot JC, de Leeuw FE, Oudkerk M, van Gijn J, Hofman A, Jolles J, Breteler MM. Cerebral white matter lesions and cognitive function: the Rotterdam Scan Study. *Ann Neurol* 2000; 47:145–151.
24. Lazarus R, Prettyman R, Cherryman G. White matter lesions on magnetic resonance imaging and their relationship with vascular risk factors in memory clinic attenders. *Int J Geriatr Psychiatry* 2005; 20:274–279.
25. Zimmermann RD, Fleming CA, Fleming CA, Leeleles BCP, Micael SA, Deck DF. Periventricular hyperintensity as seen by magnetic resonance: Prevalence and significance. *AJNR* 1986; 7:13–20.
26. White WB, Lund-Johansen P, McCabe EJ. Clinical evaluation of the Colin ABPM 630 at rest and during exercise: an ambulatory blood pressure monitor with gas-powered cuff inflation. *J Hypertens* 1989; 7:477–483.
27. Imai Y, Sasaki S, Minami N, Munakata M, Hashimoto J, Sakuma H, Sakuma M, Watanabe N, Imai K, Sekino H. The accuracy and performance of the A&D TM

- 2421, a new ambulatory blood pressure monitoring device based on the cuff-oscillometric method and the Korotkoff sound technique. *Am J Hypertens* 1992; 5:719–726.
28. Markus HS, Hunt B, Palmer K, Enzinger C, Schmidt H, Schmidt R. Markers of endothelial and hemostatic activation and progression of cerebral white matter hyperintensities: longitudinal results of the Austrian Stroke Prevention Study. *Stroke* 2005; 36:1410–1414.
  29. Simpson JE, Fernando MS, Clark L, Ince PG, Matthews F, Forster G, O'Brien JT, Barber R, Kalaria RN, Brayne C, Shaw PJ, Lewis CE, Wharton SB; MRC Cognitive Function and Ageing Neuropathology Study Group. White matter lesions in an unselected cohort of the elderly: astrocytic, microglial and oligodendrocyte precursor cell responses. *Neuropathol Appl Neurobiol* 2007; 33:410–419.
  30. Nomura E, Kohriyama T, Kozuka K, Kajikawa H, Nakamura S. Sequential changes in von Willebrand factor and soluble thrombomodulin in acute ischemic stroke. *J Stroke Cerebrovasc Dis* 2001; 10:257–264.
  31. Tohgi H, Utsugisawa K, Yoshimura M, Nagane Y, Ukitsu M. Local variation in expression of pro- and antithrombotic factors in vascular endothelium of human autopsy brain. *Acta Neuropathol* 1999; 98:111–118.
  32. Myöhänen H, Vaheri A. Regulation and interactions in the activation of cell-associated plasminogen. *Cell Mol Life Sci* 2004; 61:2840–2858.
  33. Soeda S, Koyanagi S, Kuramoto Y, Kimura M, Oda M, Kozako T, Hayashida S, Shimeno H. Anti-apoptotic roles of plasminogen activator inhibitor-1 as a neurotrophic factor in the central nervous system. *Thromb Haemost* 2008; 100:1014–1020.
  34. Benchenane K, Berezowski V, Ali C, Fernández-Monreal M, López-Atalaya JP, Brillault J, Chuquet J, Nouvelot A, MacKenzie ET, Bu G, Cecchelli R, Touzani O, Vivien D. Tissue-type plasminogen activator crosses the intact blood-brain barrier by low-density lipoprotein receptor-related protein-mediated transcytosis. *Circulation* 2005; 111:2241–2249.
  35. Kakar P, Lip GY. Hypertension: endothelial dysfunction, the prothrombotic state and antithrombotic therapy. *Expert Rev Cardiovasc Ther* 2007; 5:441–450.
  36. Lip GY, Blann AD, Edmunds E, Beevers DG. Baseline abnormalities of endothelial function and thrombogenesis in relation to prognosis in essential hypertension. *Blood Coagul Fibrinolysis* 2002; 13:35–41.
  37. Pantoni L, Garcia JH. Pathogenesis of leukoaraiosis: a review. *Stroke* 1997; 28:652–659.
  38. Fisher CM. Lacunes: small, deep cerebral infarcts. *Neurology* 1965; 15:774–784.
